# Supplementary material
Source: publisher figshare collection journal article supplement (https://acs.figshare.com/ndownloader/files/4298089)
Supplement: Supplementary file 1 [file 4298089]

## Supporting information

### **Synthesis and Characterization of a Series of Model Complexes of the Active Site of [Fe]-Hydrogenase (Hmd)**

Dafa Chen,<sup>†</sup> Annegret Ahrens-Botzong,<sup>‡</sup> Volker Schünemann,<sup>‡</sup> Rosario Scopelliti,<sup>†</sup> and Xile Hu<sup>\*†</sup>

<sup>†</sup> Laboratory of Inorganic Synthesis and Catalysis  
Institute of Chemical Sciences and Engineering  
Ecole Polytechnique Fédérale de Lausanne (EPFL)  
SB-ISIC-LSCI, BCH 3305, Lausanne, CH 1015, Switzerland

<sup>‡</sup> Fachbereich Physik  
Technische Universität Kaiserslautern  
D-67663 Kaiserslautern, Germany

\* To whom correspondence should be addressed. E-mail: xile.hu@epfl.ch

**A. Crystallographic Details for [Fe(CO)<sub>2</sub>(PPh<sub>3</sub>)I(hp)] (2)**

A total of 15689 reflections ( $-17 \leq h \leq 17$ ,  $-10 \leq k \leq 10$ ,  $-24 \leq l \leq 24$ ) were collected at  $T = 140(2)$  K in the range of  $2.55$  to  $26.37^\circ$  of which 4755 were unique ( $R_{\text{int}} = 0.0220$ ); MoK $\alpha$  radiation ( $\lambda = 0.71073$  Å). The structure was solved by the direct methods. All non-hydrogen atoms were refined anisotropically, and hydrogen atoms were placed in calculated idealized positions. The residual peak and hole electron densities were  $0.352$  and  $-0.233$  eÅ $^{-3}$ , respectively. The absorption coefficient was  $2.056$  mm $^{-1}$ . The least squares refinement converged normally with residuals of  $R(F) = 0.0202$ ,  $wR(F^2) = 0.0432$  and a GOF =  $1.014$  ( $I > 2\sigma(I)$ ). C<sub>25</sub>H<sub>19</sub>FeINO<sub>3</sub>P, Mw = 595.13, space group  $P2_1/c$ , Monoclinic,  $a = 14.0180(4)$ ,  $b = 8.8000(2)$ ,  $c = 19.9447(5)$  Å,  $\beta = 107.747(3)^\circ$ ,  $V = 2343.26(10)$  Å $^3$ ,  $Z = 4$ ,  $\rho_{\text{calcd}} = 1.687$  Mg/m $^3$ .

**B. Crystallographic Details for [Fe(CO)<sub>2</sub>(PPh<sub>3</sub>)I(hpp)] (3)**

A total of 20330 reflections ( $-14 \leq h \leq 14$ ,  $-18 \leq k \leq 19$ ,  $-17 \leq l \leq 18$ ) were collected at  $T = 140(2)$  K in the range of  $2.91$  to  $26.02^\circ$  of which 5313 were unique ( $R_{\text{int}} = 0.0399$ ); MoK $\alpha$  radiation ( $\lambda = 0.71073$  Å). The structure was solved by the direct methods. All non-hydrogen atoms were refined anisotropically, and hydrogen atoms were placed in calculated idealized positions. The residual peak and hole electron densities were  $0.845$  and  $-0.339$  eÅ $^{-3}$ , respectively. The absorption coefficient was  $1.787$  mm $^{-1}$ . The least squares refinement converged normally with residuals of  $R(F) = 0.0304$ ,  $wR(F^2) = 0.0657$  and a GOF =  $0.991$  ( $I > 2\sigma(I)$ ). C<sub>31</sub>H<sub>23</sub>FeINO<sub>3</sub>P, Mw = 671.22, space group  $P2_1/n$ , Monoclinic,  $a = 12.1692(7)$ ,  $b = 15.9364(8)$ ,  $c = 14.6654(9)$  Å,  $\beta = 107.473(6)^\circ$ ,  $V = 2712.9(3)$  Å $^3$ ,  $Z = 4$ ,  $\rho_{\text{calcd}} = 1.643$  Mg/m $^3$ .

**C. Crystallographic Details for [Fe(CO)<sub>2</sub>(PEt<sub>3</sub>)I(hmp)] (4)**

A total of 14550 reflections ( $-9 \leq h \leq 9$ ,  $-17 \leq k \leq 21$ ,  $-18 \leq l \leq 17$ ) were collected at  $T = 140(2)$  K in the range of  $2.87$  to  $27.88^\circ$  of which 4094 were unique ( $R_{\text{int}} = 0.0334$ ); MoK $\alpha$  radiation ( $\lambda = 0.71073$  Å). The structure was solved by the direct methods. All non-hydrogen atoms were refined anisotropically, and hydrogen atoms were placed in calculated idealized positions. The residual peak and hole electron densities were  $0.464$  and  $-0.407$  eÅ $^{-3}$ , respectively. The absorption coefficient was  $2.764$  mm $^{-1}$ . The least squares refinement converged normally with residuals of  $R(F) = 0.0246$ ,  $wR(F^2) = 0.0531$  and a GOF =  $1.035$  ( $I > 2\sigma(I)$ ). C<sub>14</sub>H<sub>21</sub>FeINO<sub>3</sub>P, Mw = 465.04, space group  $P2_1/n$ , Monoclinic,  $a = 7.49550(10)$ ,  $b = 16.4875(4)$ ,  $c = 14.0187(3)$  Å,  $\beta = 95.2490(17)^\circ$ ,  $V = 1725.19(6)$  Å $^3$ ,  $Z = 4$ ,  $\rho_{\text{calcd}} = 1.790$  Mg/m $^3$ .

**D. Crystallographic Details for [Fe(CO)<sub>2</sub>(PPh<sub>3</sub>)(hmp){S(2-*i*Pr-C<sub>6</sub>H<sub>4</sub>)}] (6)**

A total of 12233 reflections ( $-13 \leq h \leq 13$ ,  $-14 \leq k \leq 13$ ,  $-18 \leq l \leq 18$ ) were collected at  $T = 140(2)$  K in the range of  $2.77$  to  $26.02^\circ$  of which 6506 were unique ( $R_{\text{int}} = 0.1119$ ); MoK $\alpha$  radiation ( $\lambda = 0.71073$  Å). The structure was solved by the direct methods. All non-hydrogen atoms were refined anisotropically, and hydrogen atoms were placed in calculated idealized positions. The residual peak and hole electron densities were  $2.170$  and  $-0.974$  eÅ $^{-3}$ , respectively. The absorption coefficient was  $0.764$  mm $^{-1}$ . The least squares refinement converged normally with residuals of  $R(F) = 0.1128$ ,  $wR(F^2) = 0.2409$  and a GOF =  $0.930$  ( $I > 2\sigma(I)$ ). C<sub>36</sub>H<sub>34</sub>Cl<sub>2</sub>FeNO<sub>3</sub>PS, Mw = 718.42, space group  $P-1$ , Triclinic,  $a = 11.0759(19)$ ,  $b = 11.5177(14)$ ,  $c = 15.082(2)$  Å,  $\alpha = 71.085(12)^\circ$ ,  $\beta = 78.739(13)^\circ$ ,  $\gamma = 66.159(14)^\circ$ ,  $V = 1660.2(4)$  Å $^3$ ,  $Z = 2$ ,  $\rho_{\text{calcd}} = 1.437$  Mg/m $^3$ .

**E. Crystallographic Details for  $[\text{Fe}(\text{CO})_2(\text{PPh}_3)(\text{hmp})\{\text{S}(2,4,6\text{-Me}_3\text{C}_6\text{H}_2)\}]$  (7)**

A total of 7201 reflections ( $-20 \leq h \leq 19$ ,  $-18 \leq k \leq 18$ ,  $-18 \leq l \leq 19$ ) were collected at  $T = 100(2)$  K in the range of  $3.38$  to  $27.54^\circ$  of which 7201 were unique ( $R_{\text{int}} = 0.0000$ );  $\text{MoK}\alpha$  radiation ( $\lambda = 0.71073$  Å). The structure was solved by the direct methods. All non-hydrogen atoms were refined anisotropically, and hydrogen atoms were placed in calculated idealized positions. The residual peak and hole electron densities were  $1.150$  and  $-0.464$   $\text{e}\text{\AA}^{-3}$ , respectively. The absorption coefficient was  $0.634$   $\text{mm}^{-1}$ . The least squares refinement converged normally with residuals of  $R(F) = 0.0653$ ,  $wR(F^2) = 0.1390$  and a GOF =  $1.191$  ( $I > 2\sigma(I)$ ).  $\text{C}_{35}\text{H}_{32}\text{FeNO}_3\text{PS}$ , Mw =  $633.50$ , space group  $P2_1/c$ , Monoclinic,  $a = 15.649(3)$ ,  $b = 13.890(2)$ ,  $c = 14.8057(13)$  Å,  $\beta = 102.833(10)^\circ$ ,  $V = 3137.9(8)$  Å<sup>3</sup>,  $Z = 4$ ,  $\rho_{\text{calcd}} = 1.341$   $\text{Mg}/\text{m}^3$ .

**F. Crystallographic Details for *cis*-(*I*,  $\text{PPh}_3$ )- $\text{Fe}(\text{CO})_2(\text{PPh}_3)\text{I}(\text{OMe-PyS})$  (10a)**

A total of 43518 reflections ( $-11 \leq h \leq 11$ ,  $-25 \leq k \leq 25$ ,  $-22 \leq l \leq 22$ ) were collected at  $T = 100(2)$  K in the range of  $3.09$  to  $27.50^\circ$  of which 6737 were unique ( $R_{\text{int}} = 0.0947$ );  $\text{MoK}\alpha$  radiation ( $\lambda = 0.71073$  Å). The structure was solved by the direct methods. All non-hydrogen atoms were refined anisotropically, and hydrogen atoms were placed in calculated idealized positions. The residual peak and hole electron densities were  $2.401$  and  $-2.651$   $\text{e}\text{\AA}^{-3}$ , respectively. The absorption coefficient was  $1.885$   $\text{mm}^{-1}$ . The least squares refinement converged normally with residuals of  $R(F) = 0.0619$ ,  $wR(F^2) = 0.1595$  and a GOF =  $1.302$  ( $I > 2\sigma(I)$ ).  $\text{C}_{26}\text{H}_{21}\text{FeINO}_3\text{PS}\cdot\text{CH}_2\text{Cl}_2$ , Mw =  $726.14$ , space group  $P2_1/c$ , Monoclinic,  $a = 8.7884(8)$ ,  $b = 19.780(2)$ ,  $c = 17.558(3)$  Å,  $\beta = 103.934(8)^\circ$ ,  $V = 2962.3(7)$  Å<sup>3</sup>,  $Z = 4$ ,  $\rho_{\text{calcd}} = 1.628$   $\text{Mg}/\text{m}^3$ .

**G. Crystallographic Details for *trans*-(*I*,  $\text{PPh}_3$ )- $\text{Fe}(\text{CO})_2(\text{PPh}_3)\text{I}(\text{OMe-PyS})$  (10b)**

A total of 23989 reflections ( $-10 \leq h \leq 10$ ,  $-16 \leq k \leq 16$ ,  $-17 \leq l \leq 17$ ) were collected at  $T = 100(2)$  K in the range of  $3.06$  to  $25.00^\circ$  of which 5759 were unique ( $R_{\text{int}} = 0.0854$ );  $\text{MoK}\alpha$  radiation ( $\lambda = 0.71073$  Å). The structure was solved by the direct methods. All non-hydrogen atoms were refined anisotropically, and hydrogen atoms were placed in calculated idealized positions. The residual peak and hole electron densities were  $1.395$  and  $-0.632$   $\text{e}\text{\AA}^{-3}$ , respectively. The absorption coefficient was  $1.700$   $\text{mm}^{-1}$ . The least squares refinement converged normally with residuals of  $R(F) = 0.0807$ ,  $wR(F^2) = 0.1879$  and a GOF =  $1.323$  ( $I > 2\sigma(I)$ ).  $\text{C}_{26}\text{H}_{21}\text{FeINO}_3\text{PS}\cdot\text{CH}_2\text{Cl}_2$ , Mw =  $726.14$ , space group  $P-1$ , Triclinic,  $a = 8.7114(15)$ ,  $b = 14.042(3)$ ,  $c = 15.126(3)$  Å,  $\alpha = 109.470(17)$ ,  $\beta = 92.157(15)$ ,  $\gamma = 107.654(14)^\circ$ ,  $V = 1642.4(5)$  Å<sup>3</sup>,  $Z = 2$ ,  $\rho_{\text{calcd}} = 1.468$   $\text{Mg}/\text{m}^3$ .

**H. Crystallographic Details for  $[\text{Fe}(\text{CO})_2(\text{PPh}_3)_2\{\text{S}(6\text{-Me-C}_5\text{H}_3\text{N})\}]^+(\text{PF}_6)^-\cdot 3\text{CH}_3\text{CN}$  (11)**

A total of 21507 reflections ( $-14 \leq h \leq 14$ ,  $-18 \leq k \leq 18$ ,  $-18 \leq l \leq 18$ ) were collected at  $T = 140(2)$  K in the range of  $2.85$  to  $26.02^\circ$  of which 9450 were unique ( $R_{\text{int}} = 0.0305$ );  $\text{MoK}\alpha$  radiation ( $\lambda = 0.71073$  Å). The structure was solved by the direct methods. All non-hydrogen atoms were refined anisotropically, and hydrogen atoms were placed in calculated idealized positions. The residual peak and hole electron densities were  $0.400$  and  $-0.286$   $\text{e}\text{\AA}^{-3}$ , respectively. The absorption coefficient was  $0.522$   $\text{mm}^{-1}$ . The least squares refinement converged normally with residuals of  $R(F) = 0.0441$ ,  $wR(F^2) = 0.0983$  and a GOF =  $1.037$  ( $I > 2\sigma(I)$ ).  $\text{C}_{50}\text{H}_{45}\text{F}_6\text{FeN}_4\text{O}_2\text{P}_3\text{S}$ , Mw =  $1028.72$ , space group  $P-1$ , Triclinic,  $a = 11.6427(3)$ ,  $b = 14.8175(5)$ ,  $c = 14.9136(5)$  Å,  $\alpha = 76.110(3)$ ,  $\beta = 76.397(3)$ ,  $\gamma = 81.470(3)^\circ$ ,  $V = 2416.00(14)$  Å<sup>3</sup>,  $Z = 2$ ,  $\rho_{\text{calcd}} = 1.414$   $\text{Mg}/\text{m}^3$ .

**I. Crystallographic Details for [Fe(CO)<sub>2</sub>I(2,6-Me<sub>2</sub>C<sub>6</sub>H<sub>3</sub>NC)(SC<sub>5</sub>H<sub>4</sub>N-CO)] (13)**

A total of 14104 reflections ( $-9 \leq h \leq 9$ ,  $-22 \leq k \leq 22$ ,  $-17 \leq l \leq 17$ ) were collected at  $T = 140(2)$  K in the range of  $2.72$  to  $26.37^\circ$  of which 3751 were unique ( $R_{\text{int}} = 0.0568$ ); MoK $\alpha$  radiation ( $\lambda = 0.71073$  Å). The structure was solved by the direct methods. All non-hydrogen atoms were refined anisotropically, and hydrogen atoms were placed in calculated idealized positions. The residual peak and hole electron densities were  $3.010$  and  $-1.176$  eÅ<sup>-3</sup>, respectively. The absorption coefficient was  $2.612$  mm<sup>-1</sup>. The least squares refinement converged normally with residuals of  $R(F) = 0.0567$ ,  $wR(F^2) = 0.1521$  and a GOF =  $1.020$  ( $I > 2\sigma(I)$ ). C<sub>17</sub>H<sub>13</sub>FeIN<sub>2</sub>O<sub>3</sub>S, Mw =  $508.10$ , space group  $P2_1/n$ , Monoclinic,  $a = 7.5304(9)$ ,  $b = 17.855(2)$ ,  $c = 13.8288(15)$  Å,  $\beta = 95.161(10)^\circ$ ,  $V = 1851.8(4)$  Å<sup>3</sup>,  $Z = 4$ ,  $\rho_{\text{calcd}} = 1.823$  Mg/m<sup>3</sup>.

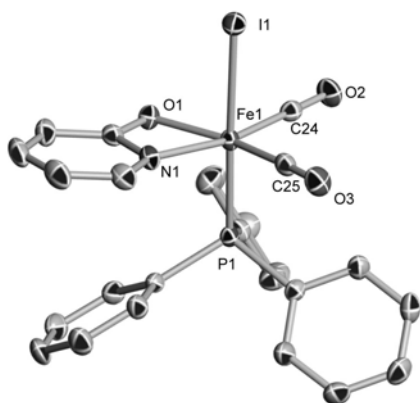

**Figure S1.** Solid-state structure of **2**. The thermal ellipsoids are displayed in 50% probability. Selected bond distances (Å) and angles (°): Fe1-N1, 1.9575(16); Fe1-O1, 2.0274(13); Fe1-P1, 2.2556(6); Fe1-C24, 1.794(2); Fe1-C25, 1.778(2); Fe1-I1, 2.6536(3); C24-O2, 1.136(2); C25-O3, 1.140(2); C5-O1, 1.309(2); C5-N1, 1.349(2); C1-N1, 1.342(3); C24-Fe1-C25, 94.74(9); O1-Fe1-N1, 66.42(6).

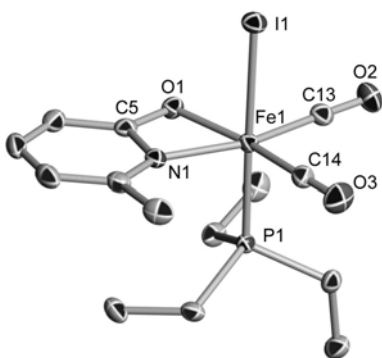

**Figure S2.** Solid-state molecular structure of complex **4**. The thermal ellipsoids are displayed at 50% probability. Selected bond distances (Å) and angles (°): Fe1-N1, 1.973(2); Fe1-O1, 2.0104(16); Fe1-P1, 2.2477(6); Fe1-C13, 1.787(3); Fe1-C14, 1.774(2); Fe1-I1, 2.6752(3); C13-O2, 1.135(3); C14-O3, 1.140(3); C5-O1, 1.307(3); C5-N1, 1.355(3); C13-Fe1-C14, 90.57(11); O1-Fe1-N1, 66.63(7).

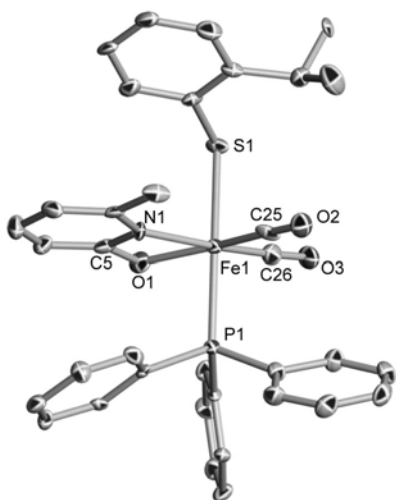

**Figure S3.** Solid-state molecular structure of complex **6**. The thermal ellipsoids are displayed at 50% probability. Selected bond distances (Å) and angles (°): Fe1-N1, 1.967(8); Fe1-O1, 2.001(6); Fe1-P1, 2.273(3); Fe1-C25, 1.808(11); Fe1-C26, 1.812(10); Fe1-S1, 2.365(3); C25-O2, 1.128(10); C26-O3, 1.123(10); C5-O1, 1.323(12); C5-N1, 1.373(12); C25-Fe1-C26, 93.6(4); O1-Fe1-N1, 67.3(3).

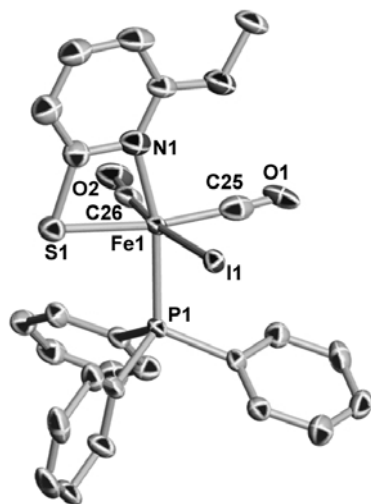

**Figure S4.** Solid-state molecular structure of complex **10a**. The thermal ellipsoids are displayed at 50% probability. One CH<sub>2</sub>Cl<sub>2</sub> molecule was omitted. Selected bond distances (Å) and angles (°): Fe1-I1, 2.6716(9); Fe1-N1, 2.002(6); Fe1-P1, 2.2769(16); Fe1-C25, 1.823(9); Fe1-C26, 1.788(6); Fe1-S1, 2.3888(19); C25-O1, 1.021(9); C26-O2, 1.135(8); C25-Fe1-C26, 89.8(3).

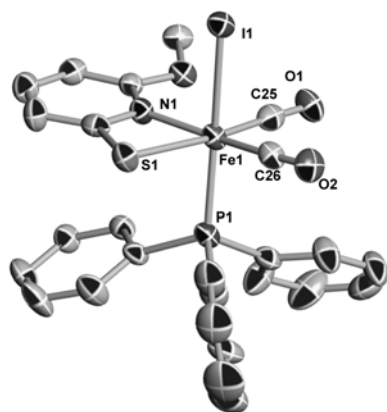

**Figure S5.** Solid-state molecular structure of complex **10b**. The thermal ellipsoids are displayed at 50% probability. One CH<sub>2</sub>Cl<sub>2</sub> molecule was omitted. Selected bond distances (Å) and angles (°): Fe1-I1, 2.6777(16); Fe1-N1, 2.005(8); Fe1-P1, 2.257(3); Fe1-C25, 1.784(13); Fe1-C26, 1.790(11); Fe1-S1, 2.365(3); C25-O1, 1.167(13); C26-O2, 1.134(12); C25-Fe1-C26, 90.3(5).

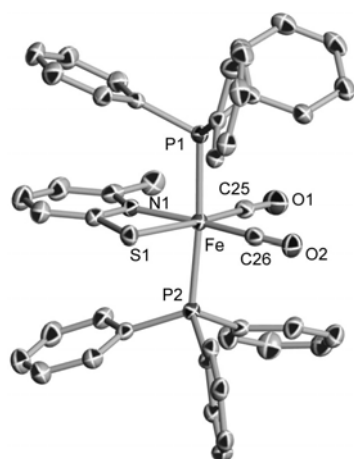

**Figure S6.** Solid-state molecular structure of complex **11**. The thermal ellipsoids are displayed at 50% probability. Selected bond distances (Å) and angles (°): Fe1-N1, 1.997(2); Fe1-P1, 2.3146(8); Fe1-P2, 2.3045(8); Fe1-C25, 1.807(3); Fe1-C26, 1.779(3); Fe1-S1, 2.3322(8); C25-O2, 1.131(3); C26-O3, 1.144(3); C25-Fe1-C26, 89.58(12).

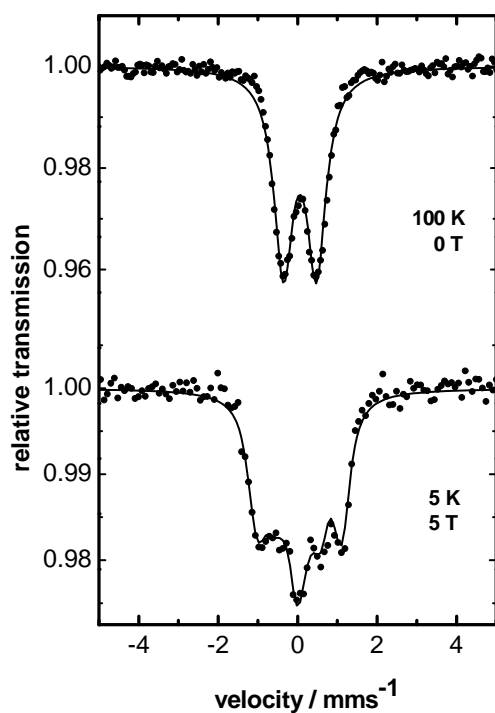

**Fig. S7.** (Top) Mössbauer spectrum of complex **5** taken at 100 K. The isomer shift is  $\delta = 0.06 (\pm 0.02) \text{ mms}^{-1}$ , the quadrupole splitting is  $\Delta E_Q = (-) 0.83 (\pm 0.02) \text{ mms}^{-1}$  and the linewidth is  $\Gamma = 0.58 (\pm 0.02) \text{ mms}^{-1}$ . (Bottom) Mössbauer spectrum of complex **5** taken at 5 K with a magnetic field of 5 T perpendicular to the  $\gamma$ -ray. The isomer shift is  $\delta = 0.04 (\pm 0.02) \text{ mms}^{-1}$ , the quadrupole splitting is  $\Delta E_Q = - 0.87 (\pm 0.03) \text{ mms}^{-1}$  and the linewidth is  $\Gamma = 0.44 (\pm 0.02) \text{ mms}^{-1}$ .



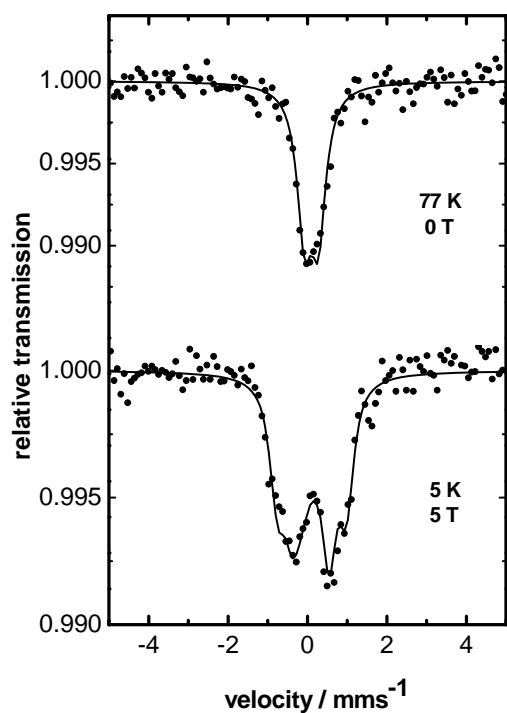

**Fig. S8.** (Top) Mössbauer spectrum of complex **9** taken at 77 K. The isomer shift is  $\delta = 0.10 (\pm 0.01) \text{ mms}^{-1}$ , the quadrupole splitting is  $\Delta E_Q = -0.35 (\pm 0.03) \text{ mms}^{-1}$  and the linewidth is  $\Gamma = 0.45 (\pm 0.05) \text{ mms}^{-1}$ . (Bottom) Mössbauer spectrum of complex **9** taken at 5 K with a magnetic field of 5 T perpendicular to the  $\gamma$ -ray. The isomer shift is  $\delta = 0.11 (\pm 0.02) \text{ mms}^{-1}$ , the quadrupole splitting is  $\Delta E_Q = -0.36 (\pm 0.03) \text{ mms}^{-1}$  and the linewidth is  $\Gamma = 0.40 (\pm 0.02) \text{ mms}^{-1}$ .

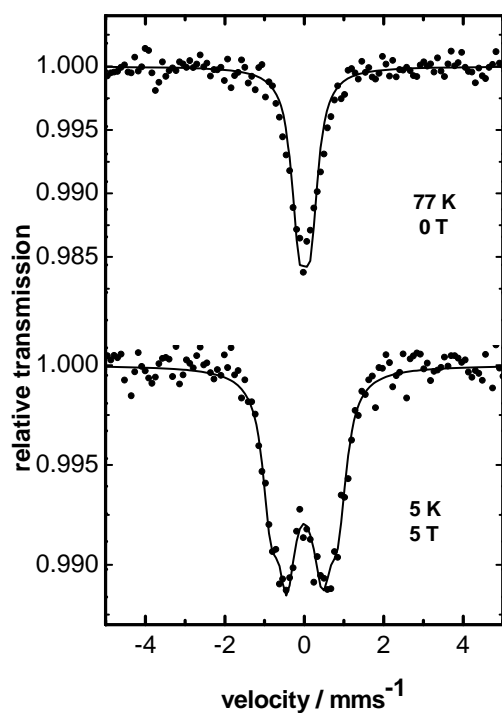

**Fig. S9.** (Top) Mössbauer spectrum of complex **13** taken at 77 K. The isomer shift is  $\delta = 0.01$  ( $\pm 0.02$ )  $\text{mms}^{-1}$ , the quadrupole splitting is  $\Delta E_Q = (+) 0.29$  ( $\pm 0.02$ )  $\text{mms}^{-1}$  and the linewidth is  $\Gamma = 0.45$  ( $\pm 0.05$ )  $\text{mms}^{-1}$ . (Bottom) Mössbauer spectrum of complex **13** taken at 5 K with a magnetic field of 5 T perpendicular to the  $\gamma$ -ray. The isomer shift is  $\delta = 0.01$  ( $\pm 0.02$ )  $\text{mms}^{-1}$ , the quadrupole splitting is  $\Delta E_Q = + 0.29$  ( $\pm 0.04$ )  $\text{mms}^{-1}$  and the linewidth is  $\Gamma = 0.47$  ( $\pm 0.03$ )  $\text{mms}^{-1}$ .

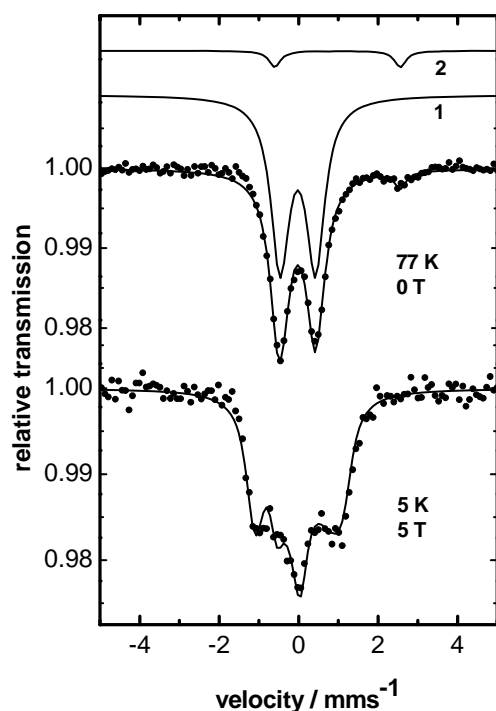

**Fig. S10.** (Top) Mössbauer spectrum of complex **17** taken at 77 K. There are two different components. The isomer shift for the first component is  $\delta = -0.02 (\pm 0.02) \text{ mms}^{-1}$ , the quadrupole splitting is  $\Delta E_Q = (+) 0.89 (\pm 0.02) \text{ mms}^{-1}$  and the linewidth is  $\Gamma = 0.57 (\pm 0.02) \text{ mms}^{-1}$ . The relative contribution of this component is 94 %. The isomer shift for the second component is  $\delta = 0.98 (\pm 0.02) \text{ mms}^{-1}$ , the quadrupole splitting is  $\Delta E_Q = 3.16 (\pm 0.02) \text{ mms}^{-1}$  and the linewidth is  $\Gamma = 0.35 (\pm 0.02) \text{ mms}^{-1}$ . The iron is therefore in a Fe(II)  $S = 2$  state. The relative contribution of this component is 6 %. (Bottom) Mössbauer spectrum of complex **17** taken at 5 K with a magnetic field of 5 T perpendicular to the  $\gamma$ -ray. The isomer shift is  $\delta = -0.01 (\pm 0.02) \text{ mms}^{-1}$ , the quadrupole splitting is  $\Delta E_Q = +0.91 (\pm 0.03) \text{ mms}^{-1}$  and the linewidth is  $\Gamma = 0.47 (\pm 0.02) \text{ mms}^{-1}$ . The minor component splits into multiple lines at high field and is therefore not detectable under high field conditions.

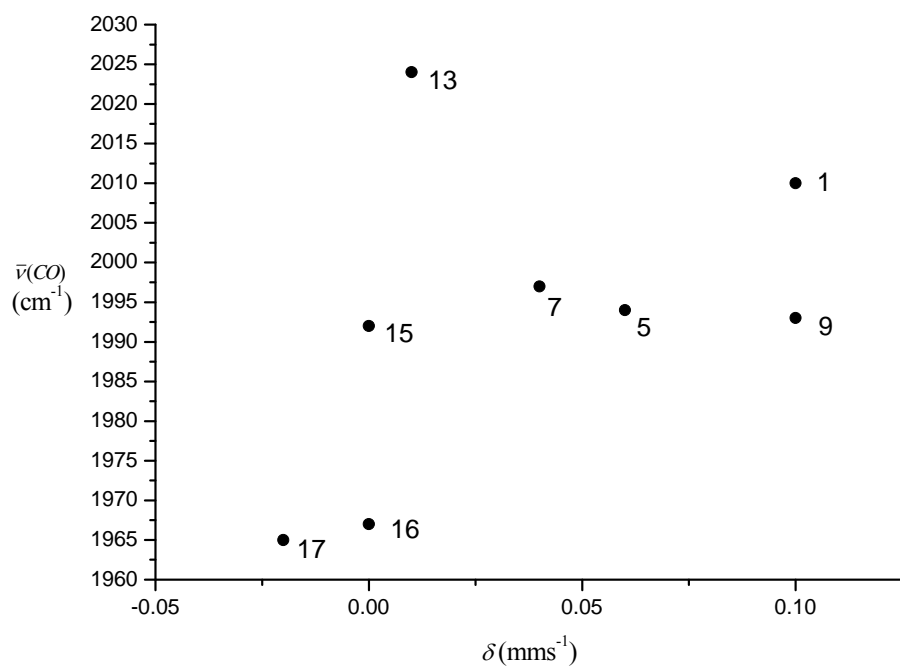

**Fig. S11.** Correlation of Mössbauer isomeric shifts with the averaged  $\nu(\text{CO})$  frequencies of 8 model complexes.
